# Supplementary material for: An amorphous NiSx film as a robust cocatalyst for boosting photocatalytic hydrogen generation over ultrafine ZnCdS nanoparticles
Source: Royal Society of Chemistry journal article supplement (doi:10.1039/d1ma00067e), 2021-01-01
Supplement: d1ma00067e1.pdf [file d1ma00067e1.pdf]

## Supplementary Information

### Amorphous NiS<sub>x</sub> film as a robust cocatalyst for boosting photocatalytic hydrogen generation over ultrafine ZnCdS nanoparticles

Shenglong Gan, Min Deng, Dongfang Hou\*, Lei huang, Xiu-qing Qiao and Dong-sheng Li\*

*College of Materials and Chemical Engineering, Hubei Provincial Collaborative Innovation  
Center for New Energy Microgrid, Key laboratory of inorganic nonmetallic crystalline and  
energy conversion materials, China Three Gorges University, Yichang 443002, P. R. China*

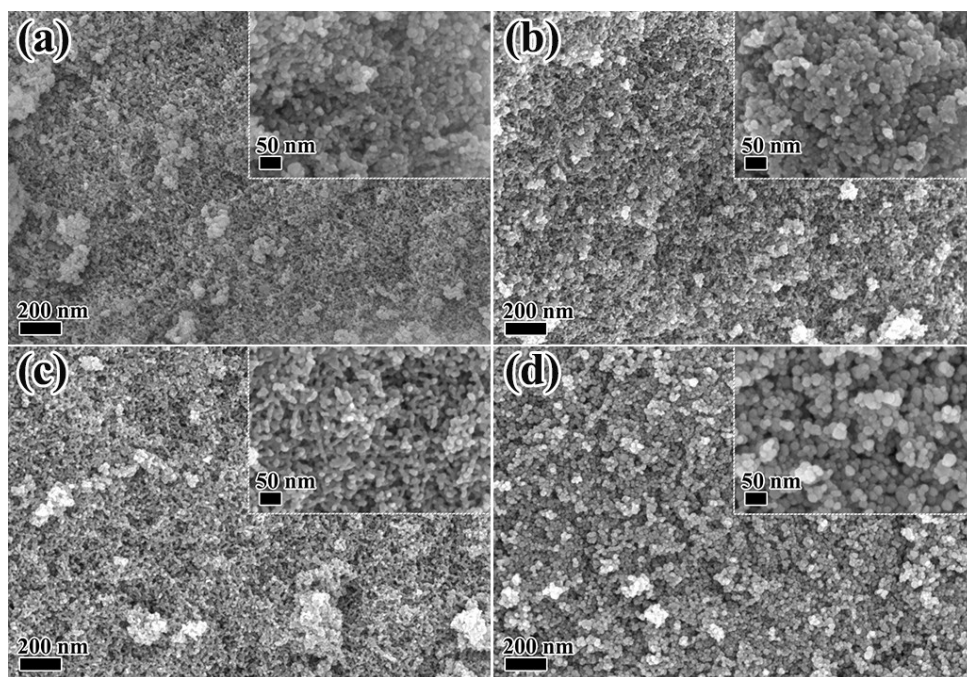

Fig. S1 SEM images: (a) ZCS, (b) ZCS-NS2, (c) CS-NS, and (d) ZS-NS nanocomposites.

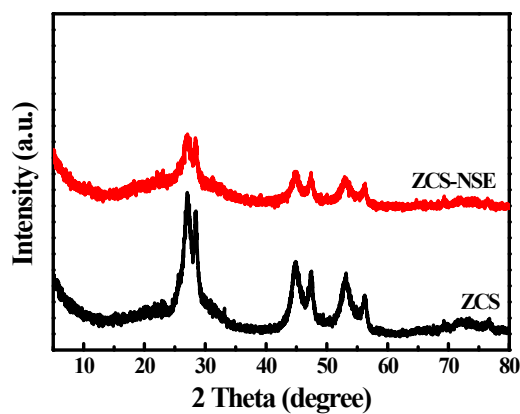

Fig. S2 The XRD patterns of ZCS and ZCS-NSE.

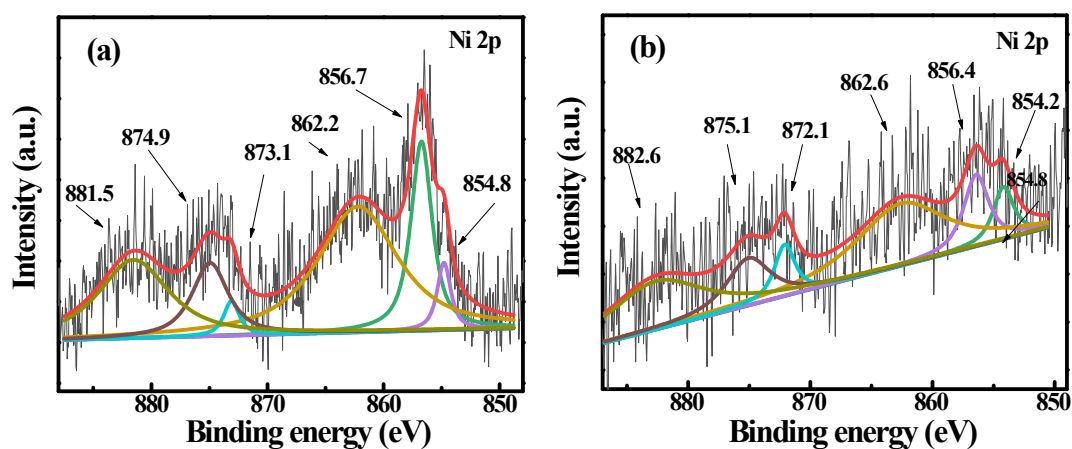

Fig. S3 High-resolution XPS spectra of Ni 2p of (a) CdS and (b) ZnS.

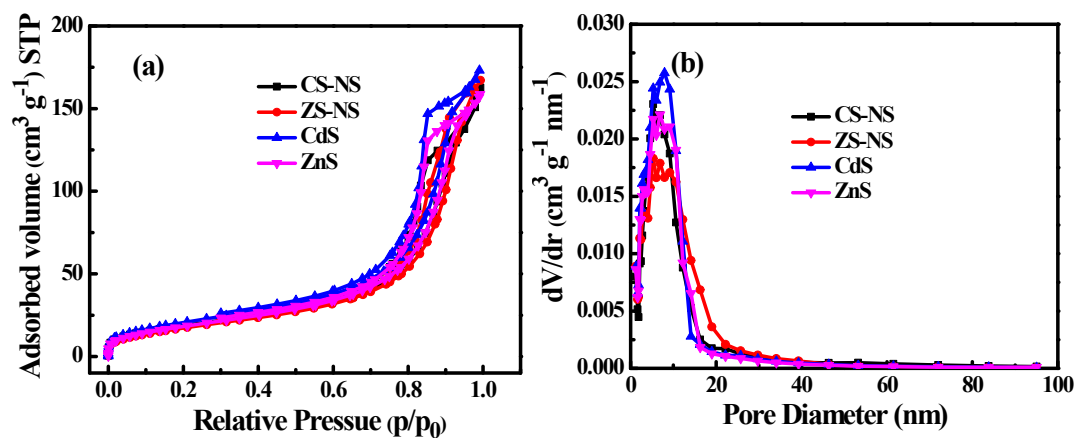

Fig. S4 Nitrogen adsorption/desorption isotherms and the corresponding pore-size distribution curves of the CS-NS, ZS-NS, CdS and ZnS.

As shown in Fig. S4 and Table S1, the present synthetic method can be extended to synthesize CS-NS, ZS-NS, CdS and ZnS with large specific surface areas, which is benefit to improve the photocatalytic performance.

Table S1 The corresponding textural properties of prepared samples.

| Sample  | $S_{\text{BET}}$<br>( $\text{m}^2 \text{g}^{-1}$ ) | Mean pore diameter<br>(nm) | Pore volume<br>( $\text{cm}^3 \text{g}^{-1}$ ) |
|---------|----------------------------------------------------|----------------------------|------------------------------------------------|
| ZCS     | 102.23                                             | 11.75                      | 0.30                                           |
| ZCS-NS1 | 89.01                                              | 12.60                      | 0.28                                           |
| ZCS-NS2 | 96.30                                              | 11.90                      | 0.29                                           |
| ZCS-NS3 | 95.14                                              | 11.82                      | 0.28                                           |
| ZnS     | 70.66                                              | 13.77                      | 0.247                                          |
| ZS-NS   | 67.11                                              | 15.31                      | 0.26                                           |
| CdS     | 78.57                                              | 13.61                      | 0.27                                           |
| CS-NS   | 70.63                                              | 14.02                      | 0.25                                           |

Table S2 Comparison of some nickel sulfide cocatalysts for photocatalytic hydrogen evolution.

| Photocatalyst                                                          | Light source                                                                   | Sacrificial agent                                | Activity<br>$\text{mmol h}^{-1} \text{g}^{-1}$ | Ref.             |
|------------------------------------------------------------------------|--------------------------------------------------------------------------------|--------------------------------------------------|------------------------------------------------|------------------|
| NiS/CdS                                                                | 300 W Xe-lamp<br>$\lambda > 420 \text{ nm}$                                    | $\text{Na}_2\text{S}$ , $\text{Na}_2\text{SO}_3$ | 1.131                                          | 1 <sup>1</sup>   |
| NiS/ $\text{Zn}_{0.5}\text{Cd}_{0.5}\text{S}$                          | 300 W Xe-lamp<br>$\lambda > 420 \text{ nm}$                                    | $\text{Na}_2\text{S}$ , $\text{Na}_2\text{SO}_3$ | 16.780                                         | 2 <sup>2</sup>   |
| NiS/ $\text{Zn}_{0.5}\text{Cd}_{0.5}\text{S}$ / RGO                    | solar simulator                                                                | $\text{Na}_2\text{S}$ , $\text{Na}_2\text{SO}_3$ | 7.514                                          | 3 <sup>3</sup>   |
| NiS/ $\text{Cd}_{0.4}\text{Zn}_{0.6}\text{S}$                          | AM 1.5, 100 $\text{mW cm}^{-2}$<br>300 W Xe-lamp<br>$\lambda > 420 \text{ nm}$ | $\text{Na}_2\text{S}$ , $\text{Na}_2\text{SO}_3$ | 1.2                                            | 4 <sup>4</sup>   |
| CdS/NiS/RGO                                                            | 300 W Xe-lamp<br>$\lambda > 420 \text{ nm}$                                    | lactic acid                                      | 14.960                                         | 5 <sup>5</sup>   |
| NiS/ $\text{ZnIn}_2\text{S}_4$                                         | 320 W Xe-lamp<br>$\lambda > 420 \text{ nm}$                                    | lactic acid                                      | 3.333                                          | 6 <sup>6</sup>   |
| $\text{C}_3\text{N}_4$ - $\text{Zn}_{0.5}\text{Cd}_{0.5}\text{S}$ -NiS | 300 W Xe-lamp<br>$\lambda > 420 \text{ nm}$                                    | $\text{Na}_2\text{S}$ , $\text{Na}_2\text{SO}_3$ | 53.19                                          | 7 <sup>7</sup>   |
| $\text{Zn}_{0.2}\text{Cd}_{0.8}\text{S}/\text{MoS}_2/\text{NiS}$       | 300 W Xe-lamp<br>solar light irradiation                                       | $\text{Na}_2\text{S}$ , $\text{Na}_2\text{SO}_3$ | 41.29                                          | 8 <sup>8</sup>   |
| NiSx/ $\text{Cd}_{0.8}\text{Zn}_{0.2}\text{S}/\text{rGO}$              | 300 W Xe-lamp<br>$\lambda > 420 \text{ nm}$                                    | lactic acid                                      | 7.84                                           | 9 <sup>9</sup>   |
| $\text{Cd}_{0.5}\text{Zn}_{0.5}\text{S}(\text{en})/\text{NiS}$         | 300 W Xe-lamp<br>$\lambda > 420 \text{ nm}$                                    | $\text{Na}_2\text{S}$ , $\text{Na}_2\text{SO}_3$ | 38.187                                         | 10 <sup>10</sup> |
| $\text{CdS}/\text{La}_2\text{Ti}_2\text{O}_7/\text{NiS}_2$             | 300 W Xe-lamp<br>$\lambda > 400 \text{ nm}$                                    | lactic acid                                      | 12.77                                          | 11 <sup>11</sup> |
| NiS/g- $\text{C}_3\text{N}_4$                                          | 300 W Xe lamp<br>an AM 1.5 G filter                                            | triethanolamine                                  | 16.4                                           | 12 <sup>12</sup> |
| NiS/CdS                                                                | 300 W Xe-lamp<br>$\lambda > 420 \text{ nm}$                                    | lactic acid                                      | 30.1                                           | 13 <sup>13</sup> |
| NiSx/CdZnS                                                             | 300 W Xe-lamp<br>$\lambda > 420 \text{ nm}$                                    | lactic acid                                      | 67.75                                          | This<br>Work     |

Table S3 The photocatalytic hydrogen evolution rates under single-wavelength light and the corresponding AQE of ZCS and ZCS-NS2.

| Sample  | 420 nm                                                           |         | 500 nm                                                           |        | 520 nm                                                           |        |
|---------|------------------------------------------------------------------|---------|------------------------------------------------------------------|--------|------------------------------------------------------------------|--------|
|         | H <sub>2</sub> evolution (μmol g <sup>-1</sup> h <sup>-1</sup> ) | AQE     | H <sub>2</sub> evolution (μmol g <sup>-1</sup> h <sup>-1</sup> ) | AQE    | H <sub>2</sub> evolution (μmol g <sup>-1</sup> h <sup>-1</sup> ) | AQE    |
| ZCS     | 216.3                                                            | 0.155%  | 23.7                                                             | 0.015% | 5.7                                                              | 0.003% |
| ZCS-NS2 | 23991.0                                                          | 17.073% | 3286.8                                                           | 1.965% | 92.3                                                             | 0.053% |

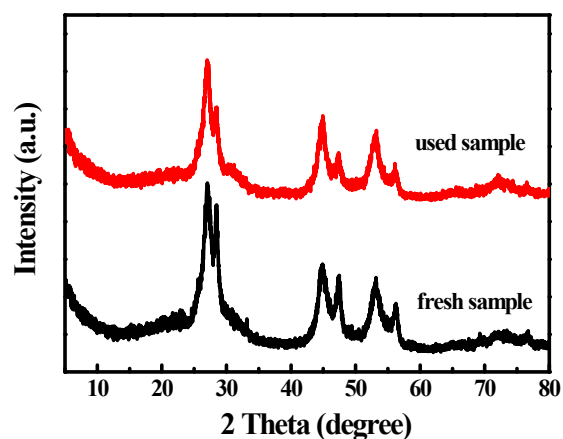

Fig. S5 The XRD patterns of the fresh and used ZCS-NS2 photocatalyst

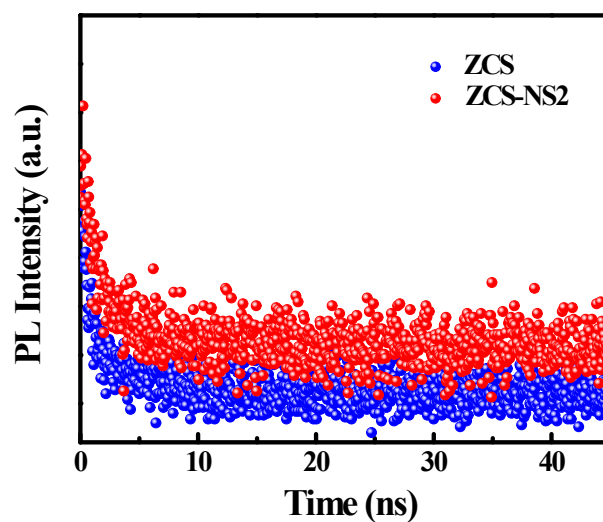

Fig. S6 Time-resolved PL decay under the excitation of 420 nm for ZCS and ZCS-NS2 samples.

Table S4 The radiative fluorescence lifetimes and relative percentages of the photoinduced charge carriers in the ZCS and ZCS-NS2

| Sample | $\tau_1$ (ns) | Rel. (%) | $\tau_2$ (ns) | Rel. (%) | $\tau$ (ns) |
|--------|---------------|----------|---------------|----------|-------------|
|--------|---------------|----------|---------------|----------|-------------|

---

|         |      |       |      |       |      |
|---------|------|-------|------|-------|------|
| ZCS     | 1.02 | 43.27 | 4.82 | 56.73 | 3.18 |
| ZCS-NS2 | 1.42 | 57.54 | 8.06 | 42.46 | 4.24 |

---

## References

- 1 J. Zhang, S. Z. Qiao, L. Qi and J. Yu, *Phys. Chem. Chem. Phys.*, 2013, **15**, 12088-12094.
- 2 X. Zhao, J. Feng, J. Liu, W. Shi, G. Yang, G.-C. Wang and P. Cheng, *Angew. Chem. Int. Ed.*, 2018, **57**, 9790-9794.
- 3 J. Zhang, L. Qi, J. Ran, J. Yu and S. Z. Qiao, *Adv. Energy Mater.*, 2014, **4**, 1301925.
- 4 J. Wang, B. Li, J. Chen, N. Li, J. Zheng, J. Zhao and Z. Zhu, *Appl. Surf. Sci.*, 2012, **259**, 118-123.
- 5 L. Li, J. Wu, B. Liu, X. Liu, C. Li, Y. Gong, Y. Huang and L. Pan, *Catal. Today*, 2018, **315**, 110-116.
- 6 A. Yan, X. Shi, F. Huang, M. Fujitsuka and T. Majima, *Appl. Catal., B*, 2019, **250**, 163-170.
- 7 G. Xu, X. Lin, Y. Tong, H. Du, L. Gu and Y. Yuan, *Mater. Lett.*, 2019, **255**, 126593.
- 8 C. An, J. Feng, J. Liu, G. Wei, J. Du, H. Wang, S. Jin and J. Zhang, *Inorg Chem Front*, 2017, **4**, 1042-1047.
- 9 C. Xue, H. Li, H. An, B. Yang, J. Wei and G. Yang, *ACS Catal.*, 2018, **8**, 1532-1545.
- 10 M. Chen, P. Wu, Y. Zhu, S. Yang, Y. Lu and Z. Lin, *Int. J. Hydrogen Energy*, 2018, **43**, 10938-10949.
- 11 J. Yue, J. Xu, J. Niu and M. Chen, *Int. J. Hydrogen Energy*, 2019, **44**, 19603-19613.
- 12 H. Zhao, H. Zhang, G. Cui, Y. Dong, G. Wang, P. Jiang, X. Wu and N. Zhao, *Appl. Catal., B*, 2018, **225**, 284-290.
- 13 Y. Zhang, Z. Peng, S. Guan and X. Fu, *Appl. Catal., B*, 2018, **224**, 1000-1008.
